# Supplementary material
Source: HighWire-hosted journal article supplement (https://erj.ersjournals.com/content/49/6/1602193)
Supplement: inline-supplementary-material-1 [file inline-supplementary-material-1.pdf]

**Table S1** Principal characteristics of conventional home care ventilation and the newer dual VAP-NIV modes

| Mode                                   | Pressure targeted                                                                                      | Volume targeted                                                                              | VAP-NIV:<br>Vt assured                                                                                                                                         | VAP-NIV:<br>Va assured                                                                                                                |
|----------------------------------------|--------------------------------------------------------------------------------------------------------|----------------------------------------------------------------------------------------------|----------------------------------------------------------------------------------------------------------------------------------------------------------------|---------------------------------------------------------------------------------------------------------------------------------------|
| <b>Definition</b>                      | Assisted Pressure Controlled Ventilation (APCV); Pressure Support Ventilation (PSV)                    | Assisted Volume Controlled Ventilation (ACV)                                                 | Volume assured pressure support ventilation targeting Vt (i.e. AVAPS, Phillips Respironics®; Vt Smart Eove®)                                                   | Volume assured pressure support ventilation targeting Va (i.e. iVAPS, ResMed®)                                                        |
| <b>Controlled variable</b>             | Inspiratory pressure                                                                                   | Vt at constant inspiratory preset flow                                                       | Minimal and Maximal Inspiratory Pressure                                                                                                                       | Minimal and Maximal Inspiratory pressure                                                                                              |
| <b>Baseline variable</b>               | ZEEP or a given EPAP *                                                                                 | ZEEP or a given EPAP*                                                                        | ZEEP or a given EPAP*. Alternatively, automatic EPAP adjustment                                                                                                | ZEEP or a given EPAP*. Alternatively, automatic EPAP adjustment                                                                       |
| <b>Trigger variable</b>                | Pressure and flow in active respiration. Time in passive respiration.                                  | Pressure and flow in active respiration. Time in passive respiration.                        | Pressure and flow in active respiration. Time in passive respiration.                                                                                          | Only Flow trigger is available in active respiration. Time in passive respiration                                                     |
| <b>Cycling variable</b>                | Time or a percentage of inspiratory flow decay (PSV or any other pressure controlled flow cycled mode) | Time                                                                                         | Time or a percentage of inspiratory flow threshold according to manufacturer's algorithm. Inspiratory time depends on a given set Ti, a Ti min or an I/E ratio | The percentage of inspiratory flow threshold is always the first cycling factor. Time cycling depends on a given set Ti min or Ti max |
| <b>Tidal Volume</b>                    | Variable according to airway impedance and patient's effort                                            | Constant                                                                                     | A minimum average Vt is maintained                                                                                                                             | A Vt value to achieve the preset Va is maintained                                                                                     |
| <b>Alveolar ventilation</b>            | Influenced by patient's effort and respiratory frequency                                               | Influenced by patient's respiratory frequency                                                | Influenced by patient's effort and respiratory frequency                                                                                                       | Maintained constant at set target Va                                                                                                  |
| <b>Flow shape profile</b>              | -                                                                                                      | Squared, ascended, descended                                                                 | -                                                                                                                                                              | -                                                                                                                                     |
| <b>Pressure ramp profile</b>           | Settable**                                                                                             | -                                                                                            | Settable                                                                                                                                                       | Settable                                                                                                                              |
| <b>Unintentional Leak Compensation</b> | Good for mild to moderate leaks                                                                        | No increase in flow rate to compensate for leakage                                           | Good for mild to moderate leaks                                                                                                                                | Good for mild to moderate leaks                                                                                                       |
| <b>Advantages</b>                      | Leak compensation<br>Flow adaptability to patient's requirements                                       | Guarantees a constant Vt (if no leaks)                                                       | Guarantees a minimal average Vt                                                                                                                                | Guarantees a minimal average Va                                                                                                       |
| <b>Disadvantages</b>                   | No guarantees for a certain Vt                                                                         | No leak compensation<br>Less patient comfort                                                 | Vt under- or overestimation. Overshooting after a disruption cessation                                                                                         | Va under- or overestimation                                                                                                           |
| <b>Used circuits</b>                   | Non-vented (exhalation valve) or intentional leak "vented" circuit                                     | Non-vented (exhalation valve). Newer ventilators also have intentional leak "vented" circuit | Non-vented (exhalation valve) or intentional leak "vented" circuit. AVAPS (Phillips Respironics®) only uses an intentional leak "vented" circuit               | Intentional leak "vented" circuit only                                                                                                |

VTPC, volume-targeted pressure controlled NIV; Vt, volume tidal; Va, alveolar ventilation; AVAPS, Average Volume Assured Pressure Support; iVAPS, intelligent volume assured pressure support; EPAP, end positive expiratory pressure; ZEEP, zero end expiratory pressure; Ti, inspiratory time; Ti min, minimal inspiratory time; I/E ratio, inspiratory/expiratory ratio; Ti max, maximal inspiratory time.

\* All ventilators using an intentional leak "vented" circuit have per default a certain level of EPAP.

\*\* Pressure ramp represents the time taken by the ventilator to reach the set inspiratory pressure. In a pressure controlled flow cycled breath, its setting may modify inspiratory time and overall inspiratory flow.
