# Supplementary material
Source: HighWire-hosted journal article supplement (https://erj.ersjournals.com/content/49/6/1602193)
Supplement: inline-supplementary-material-2 [file inline-supplementary-material-2.pdf]

**Table S2 Pressure support speed adjustment in the different home ventilators**

| Ventilator name                                                              | Adjustable by operator                                             | VAPS rate (speed of pressure support adjustment to meet the Vt)                                      |
|------------------------------------------------------------------------------|--------------------------------------------------------------------|------------------------------------------------------------------------------------------------------|
| <b>Air Liquide</b>                                                           |                                                                    |                                                                                                      |
| Monnal T40, Monnal T50                                                       | No                                                                 | ± 0,1 to 3 mbar every 3 breaths*                                                                     |
| <b>Breas</b>                                                                 |                                                                    |                                                                                                      |
| Vivo 40 with Target Volume , Vivo 50 Life-Support Ventilator, Vivo 60        | No                                                                 | ± 0,5 cmH <sub>2</sub> O per breath*                                                                 |
| <b>Löwenstein medical</b>                                                    |                                                                    |                                                                                                      |
| Prisma VENT                                                                  | Yes<br>(displayed as I,II,III)                                     | 1. ± 0,5 mbar per 8 breaths (I)<br>2. ± 1 mbar per 5 breaths (II)<br>3. ± 1,5 mbar per breaths (III) |
| <b>ResMed</b>                                                                |                                                                    |                                                                                                      |
| Stellar 150 – iVAPS, Lumis 150 VPAP ST-A – iVAPS, VPAP™ ST mit iVAPS - iVAPS | No                                                                 | IPAP increase up to 0.7cmH <sub>2</sub> O/sec<br>IPAP decrease up to -1cmH <sub>2</sub> O/sec        |
| Astral 150 – Safety Volume feature                                           | No                                                                 | ± 0,1 to 2 cmH <sub>2</sub> O per breath*                                                            |
| <b>Respironics</b>                                                           |                                                                    |                                                                                                      |
| BiPAP A30<br>BiPAP A30 Silver Series                                         | Yes<br>(displayed in a range of 0,5 cmH <sub>2</sub> O increments) | ± 0,5 to 5 cmH <sub>2</sub> O/min                                                                    |
| BiPAP A40<br>BiPAP A40 Silver Series                                         | Yes<br>(displayed in a range of 0,5 cmH <sub>2</sub> O increments) | ± 0,5 to 5 cmH <sub>2</sub> O/min                                                                    |
| BiPAP AVAPS                                                                  | No                                                                 | ± 2,5 cmH <sub>2</sub> O/min*                                                                        |
| BiPAP Synchrony II                                                           | No                                                                 | ± 1 to ± 3 cmH <sub>2</sub> O/min                                                                    |
| Trilogy100/ Trilogy200                                                       | Yes<br>(displayed in a range of 0,5 cmH <sub>2</sub> O increments) | ± 1 to 5 cmH <sub>2</sub> O/min                                                                      |
| <b>Weinmann</b>                                                              |                                                                    |                                                                                                      |
| VENTIllogic plus, VENTIllogic LS, VENTImotion 2                              | Yes<br>(displayed as slow,                                         | 1. ± 0,05 mbar per 8 breaths (slow)                                                                  |

|  |               |                                                                                |
|--|---------------|--------------------------------------------------------------------------------|
|  | medium, fast) | 2. $\pm 1$ mbar per 5 breaths (medium)<br>3. $\pm 1,5$ mbar per breaths (fast) |
|--|---------------|--------------------------------------------------------------------------------|

\*The increment/decrement in inspiratory pressure will take place in the specified time/number of breaths according to the software's algorithm. The magnitude of pressure change will depend on how far away is the monitored volume tidal from the target volume tidal.

The different dual-mode ventilators' software vary significantly the pressure support speed adjustment to reach the target  $V_t$ . While some ventilators allow the clinician to set it (e.g. 0.5-5  $\text{cmH}_2\text{O}/\text{min}$ ), other ventilators possess a fix response rate and others react after a mathematical formula according to how far away the  $V_t$  is in percentage from the preset  $V_t$ .
